# Supplementary material
Source: PubMed Central journal article supplement (PMC3103857)
Supplement: NIHMS279949-supplement-Supp1.pdf [file NIHMS279949-supplement-Supp1.pdf]

**Supplemental Table 1.** Neurons showing a significant effect of S1 distance and stimulus features during the S1 and D1 periods (two-way ANOVA). Numbers (and percentage) of cells. Periaruate (PA) and dorsolateral prefrontal (PFdl) cortex. For “combined” results, listed in the right three columns, we used  $p < 0.025$  for cells selective for S1 up or S1 down, tested separately, and the cells included in the table showed significance for one or the other conditions, or both. Cells with  $>40$  trials.

| Task period | Cortical region | N    | S1 Distance   | Features     | Feature by Distance | S1 Distance   | Features     | Feature by Distance | S1 Distance    | Features      | Feature by Distance |
|-------------|-----------------|------|---------------|--------------|---------------------|---------------|--------------|---------------------|----------------|---------------|---------------------|
|             |                 |      | S1 up         |              |                     | S1 down       |              |                     | Combined       |               |                     |
| early S1    | PA              | 1287 | 101<br>(7.8%) | 78<br>(6.1%) | 80<br>(6.2%)        | 109<br>(8.5%) | 95<br>(7.4%) | 76<br>(5.9%)        | 136<br>(10.6%) | 102<br>(7.9%) | 92<br>(7.1%)        |
|             | PFdl            | 384  | 35<br>(9.1%)  | 28<br>(7.3%) | 27<br>(7.0%)        | 23<br>(6.0%)  | 33<br>(8.6%) | 20<br>(5.2%)        | 35<br>(9.1%)   | 35<br>(9.1%)  | 26<br>(6.8%)        |
| late S1     | PA              | 1287 | 104<br>(8.1%) | 64<br>(5.0%) | 67<br>(5.2%)        | 98<br>(7.6%)  | 91<br>(7.1%) | 89<br>(6.9%)        | 121<br>(9.4%)  | 85<br>(6.6%)  | 86<br>(6.7%)        |
|             | PFdl            | 384  | 44<br>(11.5%) | 29<br>(7.6%) | 28<br>(7.3%)        | 31<br>(8.1%)  | 19<br>(4.9%) | 25<br>(6.5%)        | 46<br>(12.0%)  | 29<br>(7.6%)  | 32<br>(8.3%)        |
| D1          | PA              | 1287 | 106<br>(8.2%) | 76<br>(5.9%) | 70<br>(5.4%)        | 105<br>(8.1%) | 89<br>(6.9%) | 86<br>(6.7%)        | 135<br>(10.5%) | 97<br>(7.5%)  | 99<br>(7.7%)        |
|             | PFdl            | 384  | 37<br>(9.6%)  | 29<br>(7.6%) | 35<br>(9.1%)        | 29<br>(7.6%)  | 33<br>(8.6%) | 33<br>(8.6%)        | 43<br>(11.2%)  | 33<br>(8.6%)  | 38<br>(9.9%)        |

**Supplemental Table 2.** Polynomial contrasts for encoding of S1 distance during the early and late S1 period and D1 period. Numbers (and percentage) of cells. Periarculate (PA) and dorsolateral prefrontal (PFdl) cortex. For “combined” results, listed in the right three columns, we used  $p < 0.025$  for cells selective for S1 up or S1 down, tested separately, and the cells included in the table showed significance for one or the other conditions, or both. Cells with  $>40$  trials.

| Task period | Cortical region | N <sup>a</sup> | linear <sup>b</sup> | quadratic <sup>b</sup> | cubic <sup>b</sup> | linear <sup>b</sup> | quadratic <sup>b</sup> | cubic <sup>b</sup> | linear <sup>b</sup> | quadratic <sup>b</sup> | cubic <sup>b</sup> |
|-------------|-----------------|----------------|---------------------|------------------------|--------------------|---------------------|------------------------|--------------------|---------------------|------------------------|--------------------|
|             |                 |                | S1 up               |                        |                    | S2 down             |                        |                    | Combined            |                        |                    |
| early<br>S1 | PA              | 1287           | 22<br>(22.0%)       | 12<br>(12.0%)          | 19<br>(19.0%)      | 28<br>(26.2%)       | 19<br>(17.8%)          | 17<br>(15.9%)      | 38<br>(38.4%)       | 21<br>(21.2%)          | 15<br>(15.1%)      |
|             | PFdl            | 384            | 6<br>(18.2%)        | 7<br>(21.2%)           | 5<br>(15.1%)       | 6<br>(26.1%)        | 5<br>(21.8%)           | 5<br>(21.7%)       | 6<br>(21.4%)        | 8<br>(28.6%)           | 8<br>(28.6%)       |
| late<br>S1  | PA              | 1287           | 24<br>(21.6%)       | 21<br>(19.0%)          | 26<br>(23.4%)      | 21<br>(21.9%)       | 22<br>(23.0%)          | 15<br>(15.6%)      | 32<br>(29.7%)       | 31<br>(28.7%)          | 18<br>(16.7%)      |
|             | PFdl            | 384            | 9<br>(20.4%)        | 9<br>(20.4%)           | 11<br>(25.0%)      | 7<br>(21.9%)        | 6<br>(18.4%)           | 11<br>(34.4%)      | 11<br>(29.0%)       | 13<br>(34.2%)          | 6<br>(15.8%)       |
| D1          | PA              | 1287           | 29<br>(27.1%)       | 19<br>(17.8%)          | 18<br>(16.8%)      | 18<br>(17.5%)       | 19<br>(18.4%)          | 24<br>(23.3%)      | 36<br>(32.1%)       | 26<br>(23.2%)          | 23<br>(20.5%)      |
|             | PFdl            | 384            | 14<br>(38.9%)       | 1<br>(2.8%)            | 4<br>(11.1%)       | 3<br>(10.3%)        | 10<br>(34.5%)          | 4<br>(13.8%)       | 12<br>(36.4%)       | 6<br>(18.2%)           | 6<br>(18.2%)       |

<sup>a</sup> Total sample size

<sup>b</sup> % of cells with significant effects by ANOVA.

**Supplemental Table 3.** Results of ANOVA divided by up and down stimuli. For the S2 period, trials with all D2 periods were used, including those with a D2 of 0 ms (i.e., no D2 period). For the D2 and Choice and Action periods, the trials with no D2 were excluded. Cells with >40 trials.

| Cortical region | Task period | N    | main effect:<br>S1 or S2 farther |         |     |     | main effect:<br>red or blue farther |           |     |     |
|-----------------|-------------|------|----------------------------------|---------|-----|-----|-------------------------------------|-----------|-----|-----|
|                 |             |      | S2 up                            | S2 down | And | Or  | Blue up                             | Blue down | And | Or  |
| PA              | early S2    | 1287 | 344                              | 293     | 138 | 402 | 231                                 | 211       | 64  | 378 |
|                 | late S2     | 1287 | 407                              | 354     | 208 | 456 | 345                                 | 318       | 165 | 498 |
|                 | D2          | 1287 | 224                              | 166     | 66  | 242 | 256                                 | 280       | 148 | 388 |
|                 | C&A         | 1287 | 123                              | 104     | 16  | 132 | 246                                 | 233       | 132 | 347 |
| PFdl            | early S2    | 384  | 93                               | 65      | 29  | 103 | 37                                  | 51        | 12  | 76  |
|                 | late S2     | 384  | 89                               | 96      | 41  | 113 | 97                                  | 85        | 43  | 139 |
|                 | D2          | 384  | 52                               | 45      | 13  | 65  | 61                                  | 56        | 20  | 97  |
|                 | C&A         | 384  | 25                               | 24      | 2   | 28  | 70                                  | 69        | 32  | 107 |

**Supplemental Table 4.** Cells in the lower left and upper right of the scatter plots. Cells with >40 trials.

| Periarculate                   |                               | Prefrontal                   |                             |
|--------------------------------|-------------------------------|------------------------------|-----------------------------|
| Feature-distance index         |                               |                              |                             |
| EarlyS2<br>47/64<br>(73.4%)    | Late S2<br>152/165<br>(92.1%) | Early S2<br>9/12<br>(75%)    | Late S2<br>40/43<br>(93%)   |
| D2<br>132/148<br>(89.8%)       | C&A<br>130/132<br>(98.5%)     | D2<br>17/20<br>(85%)         | C&A<br>32/32<br>(100%)      |
| Order-distance index           |                               |                              |                             |
| Early S2<br>120/138<br>(87.0%) | Late S2<br>203/208<br>(97.6%) | Early S2<br>27/29<br>(93.1%) | Late S2<br>35/41<br>(85.4%) |
| D2<br>57/66<br>(86.4%)         | C&A<br>11/16<br>(68.8%)       | D2<br>11/13<br>(84.6%)       | C&A<br>2/2<br>(100%)        |

**Supplemental Table 5.** Results of stepwise regression for relative distance coding based on order. Cells with >40 trials. For the S2 period, trials with all D2 periods were used, including those with a D2 of 0 ms (i.e., no D2 period). For the D2 and Choice and Action periods, the trials with no D2 period were excluded.

| Cortical region | Task period | N    | S1 distance |         |     |    | S2 distance |         |     |     | S2-S1 difference |         |     |     | S2-S1 farther |         |     |     |
|-----------------|-------------|------|-------------|---------|-----|----|-------------|---------|-----|-----|------------------|---------|-----|-----|---------------|---------|-----|-----|
|                 |             |      | S2 up       | S2 down | And | Or | S2 up       | S2 down | And | Or  | S2 up            | S2 down | And | Or  | S2 up         | S2 down | And | Or  |
| PA              | early S2    | 1287 | 64          | 57      | 5   | 72 | 130         | 149     | 39  | 189 | 107              | 100     | 12  | 165 | 167           | 142     | 36  | 226 |
|                 | late S2     | 1287 | 69          | 72      | 3   | 90 | 134         | 128     | 18  | 187 | 90               | 94      | 12  | 135 | 225           | 208     | 81  | 299 |
|                 | D2          | 1287 | 50          | 40      | 1   | 60 | 92          | 77      | 9   | 112 | 70               | 51      | 4   | 79  | 111           | 102     | 14  | 147 |
|                 | C&A         | 1287 | 42          | 51      | 2   | 54 | 62          | 42      | 2   | 64  | 49               | 32      | 0   | 48  | 64            | 65      | 5   | 79  |
| PFdl            | early S2    | 384  | 20          | 24      | 2   | 31 | 41          | 45      | 9   | 58  | 35               | 18      | 2   | 33  | 50            | 29      | 5   | 62  |
|                 | late S2     | 384  | 9           | 20      | 0   | 20 | 33          | 43      | 5   | 51  | 20               | 23      | 3   | 35  | 58            | 47      | 11  | 76  |
|                 | D2          | 384  | 10          | 12      | 0   | 13 | 26          | 21      | 2   | 30  | 17               | 12      | 0   | 15  | 31            | 30      | 7   | 37  |
|                 | C&A         | 384  | 10          | 16      | 0   | 16 | 11          | 14      | 0   | 14  | 13               | 7       | 0   | 17  | 18            | 16      | 3   | 20  |

**Supplemental Table 6.** Results of stepwise regression for relative duration coding based on stimulus features. Cells with >40 trials. For the S2 period, trials with all D2 periods were used, including those with a D2 of 0 ms (i.e., no D2 period). For the D2 and Choice and Action periods, the trials with no D2 were excluded. For cells selective for S1 up or S1 down, we used  $p < 0.025$ .

| Cortical region | Task period | N    | Blue distance |         |     |     | Red distance |         |     |     | Blue-Red difference |         |     |     | Blue or Red farther |         |     |     |
|-----------------|-------------|------|---------------|---------|-----|-----|--------------|---------|-----|-----|---------------------|---------|-----|-----|---------------------|---------|-----|-----|
|                 |             |      | S2 up         | S2 down | And | Or  | S2 up        | S2 down | And | Or  | S2 up               | S2 down | And | Or  | S2 up               | S2 down | And | Or  |
| PA              | early S2    | 1287 | 84            | 82      | 5   | 88  | 88           | 90      | 10  | 118 | 50                  | 69      | 2   | 74  | 114                 | 107     | 22  | 148 |
|                 | late S2     | 1287 | 102           | 91      | 13  | 133 | 84           | 80      | 8   | 111 | 84                  | 77      | 8   | 112 | 223                 | 183     | 95  | 267 |
|                 | D2          | 1287 | 87            | 54      | 5   | 97  | 54           | 74      | 6   | 85  | 84                  | 60      | 7   | 112 | 179                 | 143     | 67  | 209 |
|                 | C&A         | 1287 | 55            | 58      | 3   | 53  | 72           | 66      | 7   | 83  | 51                  | 51      | 1   | 70  | 179                 | 171     | 82  | 214 |
| PFdl            | early S2    | 384  | 31            | 31      | 5   | 31  | 29           | 22      | 3   | 34  | 19                  | 8       | 2   | 19  | 21                  | 24      | 7   | 28  |
|                 | late S2     | 384  | 20            | 26      | 1   | 35  | 20           | 24      | 4   | 32  | 16                  | 21      | 1   | 30  | 68                  | 58      | 23  | 82  |
|                 | D2          | 384  | 20            | 17      | 2   | 24  | 28           | 26      | 4   | 31  | 19                  | 17      | 0   | 21  | 36                  | 35      | 10  | 49  |
|                 | C&A         | 384  | 22            | 22      | 1   | 28  | 19           | 13      | 0   | 22  | 22                  | 21      | 3   | 25  | 33                  | 43      | 14  | 30  |

**Supplemental Table 7.** Results of 12-factor stepwise regression for relative distance coding based on order, features, and position during the early S2, late S2, D2, and C&A periods. Cells with >40 trials. Abbreviation: diff, difference.

| Area | Task period | N    | Order      |             |             |                  | Features   |            |               |                     | Position   |            |              |                    |
|------|-------------|------|------------|-------------|-------------|------------------|------------|------------|---------------|---------------------|------------|------------|--------------|--------------------|
|      |             |      | S1         | S2          | S2-S1 diff  | S1 or S2 farther | Blue       | Red        | Red-Blue diff | Red or Blue farther | Up         | Down       | Down-Up diff | Down or Up farther |
| PA   | early S2    | 384  | 21<br>5.5% | 39<br>10.2% | 42<br>10.9% | 41<br>10.7%      | 13<br>3.4% | 20<br>5.2% | 14<br>3.6%    | 32<br>8.3%          | 16<br>4.2% | 9<br>2.3%  | 20<br>5.2%   | 30<br>7.8%         |
|      | late S2     | 384  | 10<br>2.6% | 36<br>9.4%  | 35<br>9.1%  | 67<br>17.4%      | 13<br>3.4% | 17<br>4.4% | 25<br>6.5%    | 81<br>21.1%         | 14<br>3.6% | 8<br>2.1%  | 20<br>5.2%   | 38<br>9.9%         |
|      | D2          | 384  | 9<br>2.3%  | 22<br>5.7%  | 27<br>7%    | 33<br>8.6%       | 23<br>6%   | 19<br>4.9% | 25<br>6.5%    | 43<br>11.25%        | 14<br>3.6% | 13<br>3.4% | 16<br>4.2%   | 19<br>4.9%         |
|      | C&A         | 384  | 11<br>2.9% | 12<br>3.1%  | 11<br>2.9%  | 15<br>3.9%       | 16<br>4.2% | 17<br>4.4% | 24<br>6.3%    | 57<br>14.8%         | 10<br>2.6% | 9<br>2.3%  | 8<br>2.1%    | 18<br>4.7%         |
| PFdl | early S2    | 1287 | 66<br>5.1% | 120<br>9.3% | 122<br>9.5% | 210<br>16.3%     | 46<br>3.6% | 69<br>5.4% | 55<br>4.3%    | 165<br>12.8%        | 66<br>5.1% | 66<br>5.1% | 88<br>6.8%   | 108<br>8.4%        |
|      | late S2     | 1287 | 56<br>4.4% | 115<br>8.9% | 121<br>9.4% | 292<br>22.7%     | 69<br>5.4% | 54<br>4.2% | 85<br>6.6%    | 269<br>20.9%        | 50<br>3.9% | 55<br>4.3% | 62<br>4.8%   | 112<br>8.7%        |
|      | D2          | 1287 | 45<br>3.5% | 68<br>5.3%  | 79<br>6.1%  | 146<br>11.3%     | 41<br>3.2% | 43<br>3.3% | 83<br>6.4%    | 212<br>16.5%        | 40<br>3.1% | 39<br>3.0% | 31<br>2.4%   | 85<br>6.6%         |
|      | C&A         | 1287 | 33<br>2.6% | 51<br>4.0%  | 54<br>4.2%  | 94<br>7.3%       | 38<br>3.0% | 49<br>3.8% | 57<br>4.4%    | 253<br>19.7%        | 41<br>3.2% | 30<br>2.3% | 31<br>2.4%   | 46<br>3.6%         |

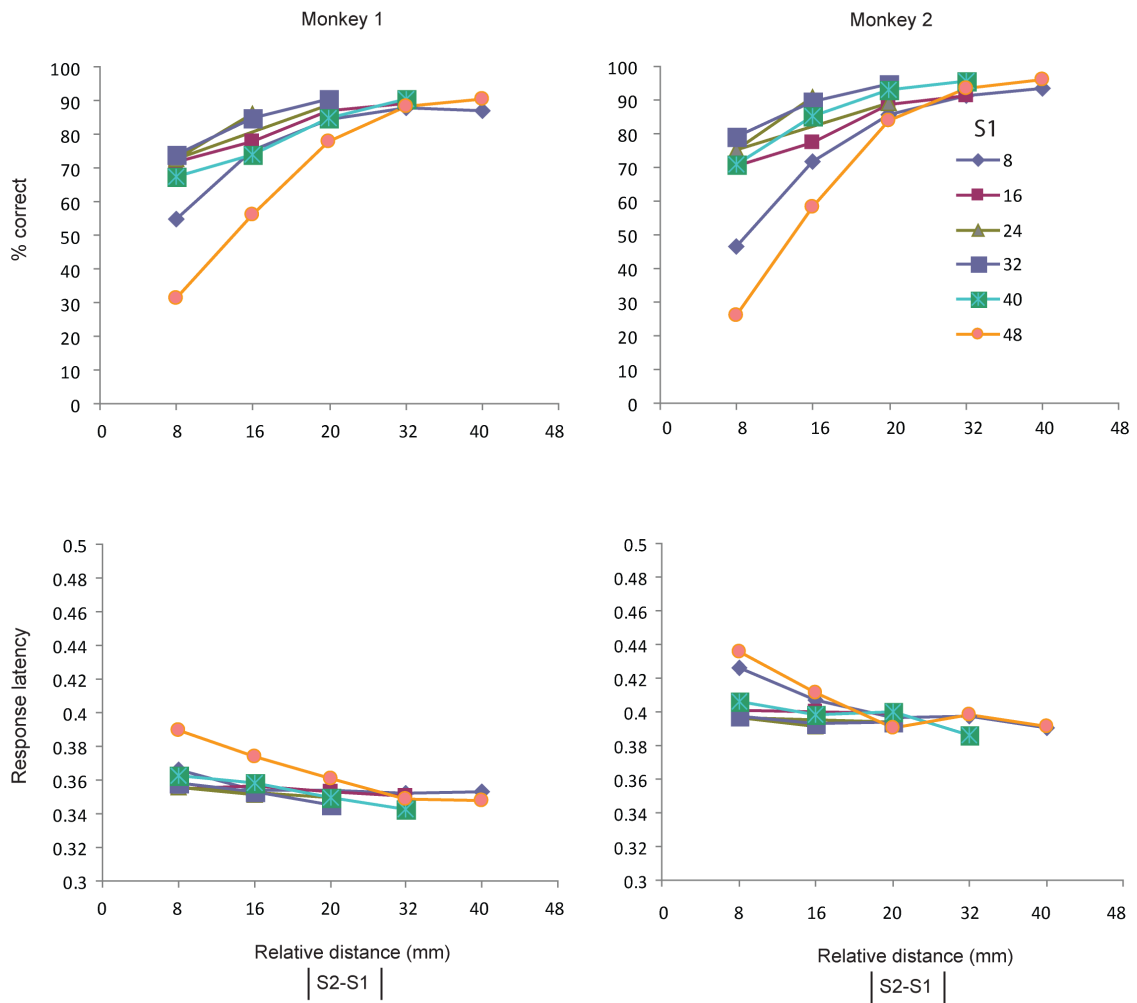

**Supplementary Figure 1.** Percent correct (top) and response latency (bottom) for first stimuli (S1) at various distances from the central reference point (color code, in mm from the reference), as a function of the relative distance between the first and second (S2) stimulus.



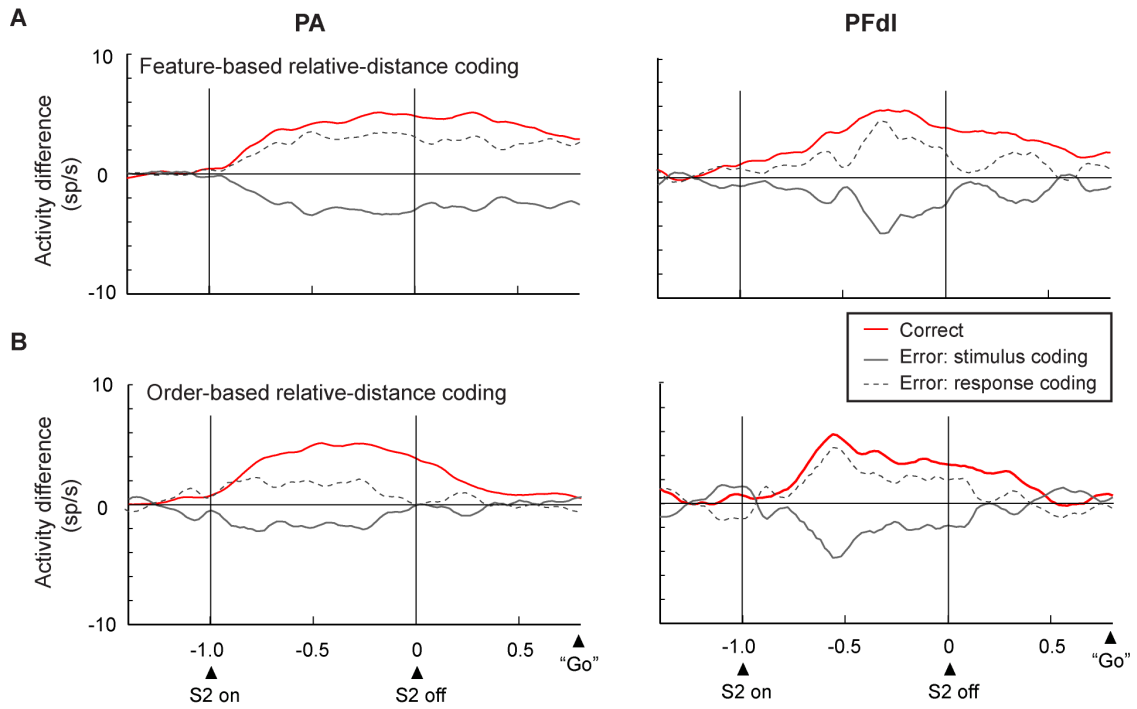

**Supplemental Figure 2.** Population difference plots. Difference in activity between preferred and anti-preferred stimulus-distance combinations for correct and error trials. **(A)** Feature-based distance coding. **(B)** Order-based distance coding. For errors, the difference is for which stimulus was farther (solid lines) and for which stimulus the monkey (incorrectly) chose as being farther (dashed lines).
